# Supplementary material for: A literature review on disease detection with automated machine learning
Source: PeerJ journal article supplement (doi:10.7717/peerj-cs.3193), 2025-09-22
Supplement: SupplementaryTables.pdf [file SupplementaryTables.pdf]

## APPENDIX

This supplementary file includes all tables, Tables S1-S9. You can also see explanations of some tables after the table titles.

**Table S1 Abbreviations and expansions**

| Abbreviation | Expansion                                                      |
|--------------|----------------------------------------------------------------|
| ADNI         | Alzheimer's Disease Neuroimaging Initiative                    |
| AE           | Autoencoders                                                   |
| AEH          | Atypical Endometrial Hyperplasia                               |
| AutoML       | Automated Machine Learning                                     |
| AWS          | Amazon Web Services                                            |
| BA           | Balanced Accuracy                                              |
| BM           | Bookmaker Informedness                                         |
| BPH          | Benign Prostatic Hyperplasia                                   |
| BRFSS        | Behavioral Risk Factor Surveillance System                     |
| CHD          | Cleveland Heart Disease Dataset                                |
| CKD          | Chronic Kidney Disease                                         |
| CLAHE        | Contrast Limited Adaptive Histogram Equalization               |
| CNN          | Convolutional Neural Networks                                  |
| CT           | Computed Tomography                                            |
| DRD          | Diabetes Readmission Dataset                                   |
| DRG          | Diagnosis-Related Group                                        |
| DSD          | Diabetes Surveillance Dataset                                  |
| EC           | Endometrial Cancer                                             |
| EDA          | Exploratory Data Analysis                                      |
| FN           | False Negative                                                 |
| FP           | False Positive                                                 |
| FSL          | Few-Shot Learning                                              |
| GA           | Genetic Algorithm                                              |
| HCV          | Hepatitis C Virus                                              |
| HHO          | Harris Hawk Optimization                                       |
| HPO          | Hyperparameter Optimization                                    |
| IBD          | Inflammatory Bowel Disease                                     |
| ICD-10       | International Classification of Diseases, 10th Revision        |
| LIME         | Local Interpretable Model-Agnostic Explanations                |
| LUTS         | Lower Urinary Tract Symptoms                                   |
| mAML         | Microbiome-based Automated Machine Learning                    |
| MALDI-MS     | Matrix-Assisted Laser Desorption/Ionization Mass Spectrometry  |
| MCC          | Matthews Correlation Coefficient                               |
| MK           | Markedness                                                     |
| ML           | Machine Learning                                               |
| MLP          | Multi-Layer Perceptron                                         |
| MOGAHHO      | Multi-Objective Genetic Algorithm and Harris Hawk Optimization |
| MRI          | Magnetic Resonance Imaging                                     |
| MS           | Mass Spectrometry                                              |
| NACC         | National Alzheimer's Coordinating Center                       |

|        |                                                                    |
|--------|--------------------------------------------------------------------|
| NAEH   | Non-Atypical Endometrial Hyperplasia                               |
| NUTS   | Nomenclature of Territorial Units for Statistics                   |
| OAI    | Osteoarthritis Initiative                                          |
| OWL    | Web Ontology Language                                              |
| PCA    | Principal Component Analysis                                       |
| PRISMA | Preferred Reporting Items for Systematic Reviews and Meta-Analyses |
| RA     | Rheumatoid Arthritis                                               |
| ROI    | Region of Interest                                                 |
| SHAP   | SHapley Additive exPlanations                                      |
| SVD    | Singular Vector Decomposition                                      |
| TN     | True Negative                                                      |
| TOPSIS | Technique for Order of Preference by Similarity to Ideal Solution  |
| TP     | True Positive                                                      |
| TPOT   | Tree-based Pipeline Optimization Tool                              |
| TSE    | Turbo Spin Echo                                                    |
| TVU    | Transvaginal Ultrasound                                            |
| T2D    | Type 2 Diabetes                                                    |
| UCI    | University of California, Irvine (ML Repository)                   |
| XAI    | eXplainable Artificial Intelligence                                |

**Table S2 Popular AutoML platforms and tools**

| <b>AutoML platform</b>     | <b>Access to data</b>  | <b>Supported data types</b>         |
|----------------------------|------------------------|-------------------------------------|
| Amazon SageMaker Autopilot | Registered, chargeable | Tabular, Time series, Image, Text   |
| Apple Create ML            | Free                   | Image, Text, Tabular                |
| ATM                        | Free                   | Tabular, Image, Text                |
| AutoGluon (Amazon)         | Registered, chargeable | Image, Text, Tabular data           |
| Auto-Keras                 | Free                   | Text, Image, Tabular                |
| AutoPrognosis              | Free                   | Tabular                             |
| Auto-Sklearn               | Free                   | Tabular                             |
| Auto-WEKA                  | Free                   | Tabular                             |
| BigML OptiML               | Free                   | Tabular, Image, Text, Time series   |
| Darwin                     | Registered, chargeable | Tabular                             |
| DataBricks                 | Registered, chargeable | Tabular, Text, Time series          |
| DataRobot                  | Registered, chargeable | Time series, Image, Text            |
| FEDOT                      | Free                   | Tabular, Time series, Image, Text   |
| FLAML (Microsoft)          | Registered, chargeable | Tabular, Text, Time series          |
| Google Cloud AutoML        | Registered, chargeable | Tabular, Image, Text and video data |
| Google Vertex AI           | Registered, chargeable | Tabular, Image, Text and video data |
| H2O AutoML                 | Registered, chargeable | Tabular, Text                       |
| H2O Driverless AI          | Registered, chargeable | Time series, Tabular, Image, Text   |
| JADBIO                     | Registered, chargeable | Tabular                             |
| IBM Watson AutoAI          | Registered, chargeable | Tabular, Text, Time series          |
| Ludwig                     | Free                   | Tabular, Text, Time series          |
| MLBox                      | Free                   | Tabular                             |
| MS Azure AutoML            | Registered, chargeable | Time series, Image, Text            |



**Table S4 Query statements**

The query statements used in this process, along with the corresponding source details. It was observed that effective filltering could not be achieved in Google Scholar, SpringerLink, and Taylor & Francis due to the general nature of their search functionalities, which do not support advanced search phrases or complex query statements. Additionally, since Hindawi journals have been integrated into Wiley's open access journal portfolio, searches conducted through Google Scholar, SpringerLink, Hindawi, and Taylor & Francis were excluded from the analysis. Consequently, as shown in Table S4, the final searches were carried out using seven selected digital repositories.

| Databases              | Query statements                                                                                                                                                                                                                    |
|------------------------|-------------------------------------------------------------------------------------------------------------------------------------------------------------------------------------------------------------------------------------|
| IEEE Xplore            | ("All Metadata":"disease detection" OR "All Metadata":"disease diagnosis" OR "All Metadata":"disease prediction" OR "All Metadata":"human healthcare") AND ("All Metadata":"automated machine learning" OR "All Metadata":"AutoML") |
| Scopus                 | TITLE-ABS-KEY ("disease detection" OR "disease diagnosis" OR "human healthcare") AND ("automi" OR "automated machine learning")                                                                                                     |
| Web of Science         | ALL= (("disease detection" OR "disease diagnosis" OR "disease prediction" OR "human healthcare") AND ("AutoML" OR "automated machine learning"))                                                                                    |
| PubMed                 | ((("disease detection" OR "disease diagnosis" OR "human healthcare") AND ("AutoML" OR "automated machine learning"))                                                                                                                |
| Acm Digital Library    | [[All: "disease detection"] OR [All: "disease diagnosis"] OR [All: "disease prediction"] OR [All: "human healthcare"]]] AND [[All: "automated machine learning"] OR [All: "automi"]]]                                               |
| Wiley Online Library   | ""disease detection" OR "disease diagnosis" OR "disease prediction" OR "human healthcare"" anywhere and ""automated machine learning" OR "automi"" anywhere                                                                         |
| ScienceDirect Elsevier | ("disease detection" OR "disease diagnosis" OR "disease prediction" OR "human healthcare") AND ("AutoML" OR "automated machine learning")                                                                                           |

**Table S5 Digital databases filtering results**

As a result of the screening process conducted across seven different digital databases from January 2020 to March 2025, studies were filtered based on predefined inclusion and exclusion criteria. Initially, 552 studies were identified. Of these, 40 studies published outside the 2020-2025 time frame were excluded. Subsequently, 117 studies not published in peer reviewed journals were removed. An additional 145 studies were excluded for being reviews, books, conference proceedings, posters, editorial notes, or similar publication types. Finally, 7 studies were excluded for not focusing on human diseases. After applying all elimination criteria, 243 studies were retained for full-text review.

|                            | Searching      | Excluding                                                             |                     |                          |                     |                     | Screening |
|----------------------------|----------------|-----------------------------------------------------------------------|---------------------|--------------------------|---------------------|---------------------|-----------|
| Digital Library            | Identification | 2020-2025 or not?                                                     | Journal or not?     | Article or not?          | Language = English  | Humans or not?      | Papers    |
| IEEE Xplore                | 6              | 0                                                                     | 6                   | No searching filter      | No searching filter | No searching filter | 6*        |
| Scopus                     | 37             | 1                                                                     | 17                  | 1                        | 0                   | No searching filter | 18        |
| Pubmed                     | 18             | 4                                                                     | No searching filter | Lots of searching filter | 0                   | 7                   | 7         |
| Web of Science (WoS)       | 32             | 1                                                                     | No searching filter | 8                        | 0                   | No searching filter | 23        |
| ACM Digital Library        | 105            | 6                                                                     | 90                  | 5                        | No searching filter | No searching filter | 4         |
| Wiley Online Library       | 90             | 14                                                                    | 16                  | No searching filter      | No searching filter | No searching filter | 60        |
| ScienceDirect-Elsevier     | 264            | 14                                                                    | No searching filter | 125                      | No searching filter | No searching filter | 125       |
| *IEEE Conferences included |                | Number of articles that underwent full text, keyword and title review |                     |                          |                     |                     | 243       |

**Table S6 Papers and Dataset**

A comprehensive summary of all 24 reviewed papers is presented, including detailed explanations of the proposed prediction models. This thorough overview allows researchers to understand each study in depth, draw comparisons across different approaches, and identify gaps in the existing literature. Following the summaries, the studies are individually analyzed in relation to each research question. Detailed information about the papers and datasets used is provided in Table S6.

| # | Papers                                                                                                                              | Dataset                                                             |
|---|-------------------------------------------------------------------------------------------------------------------------------------|---------------------------------------------------------------------|
| 1 | mAML: an automated machine learning pipeline with a microbiome repository for human disease classification (Yang & Zou 2020)        | GMrepo Microbiome Learning repository                               |
| 2 | Setting up an Easy-to-Use Machine Learning Pipeline for Medical Decision Support: A Case Study for COVID-19 Diagnosis Based on Deep | Collected from COVID-19-related publications on medRxiv and bioRxiv |

|    |                                                                                                                                                                                          |                                                                                                                                                                                                 |
|----|------------------------------------------------------------------------------------------------------------------------------------------------------------------------------------------|-------------------------------------------------------------------------------------------------------------------------------------------------------------------------------------------------|
|    | Learning with CT Scans (Sakagianni et al. 2020)                                                                                                                                          |                                                                                                                                                                                                 |
| 3  | Time Series Analysis and Forecasting with Automated Machine Learning on a National ICD-10 Database (Olsavszky et al. 2020)                                                               | National ICD-10 Database                                                                                                                                                                        |
| 4  | Heart disease prediction using hyper parameter optimization (HPO) tuning (Valarmathi & Sheela 2021)                                                                                      | CHD and Z-Alizadeh Sani dataset                                                                                                                                                                 |
| 5  | Benchmarking AutoML frameworks for disease prediction using medical claims (A. Romero et al. 2022)                                                                                       | lung cancer, prostate cancer, RA, T2D, IBD, and CKD Medicare or Commercial plans                                                                                                                |
| 6  | Automated Machine Learning for Prediction of Type 2 Diabetes and Its Major Complications: A Comparative Study (Mallikarachchi et al. 2023)                                               | 2015 US BRFSS dataset                                                                                                                                                                           |
| 7  | CloudAISim: A toolkit for modelling and simulation of modern applications in AI-driven cloud computing environments (Bhowmik et al. 2023)                                                | UCI Breast Cancer Wisconsin (Diagnostic), UCI Heart Disease Cleveland dataset, National Institute of Diabetes and Digestive and Kidney Diseases, and “Covid-19” (Chowdhury et al. 2022) dataset |
| 8  | Evaluating the performance of automated machine learning (AutoML) tools for heart disease diagnosis and prediction (Paladino et al. 2023)                                                | Cleveland Heart Disease and UCI Hungarian Heart disease datasets                                                                                                                                |
| 9  | Clinical Hematochemical Parameters in Differential Diagnosis between Pediatric SARS-CoV-2 and Influenza Virus Infection: An Automated Machine Learning Approach (Dobrijević et al. 2023) | A total of 268 pediatric patients (133 diagnosed with SARS-CoV-2 and 135 with Influenza) were included in the study conducted by the Institute for Child and Youth Health Care of Vojvodina     |
| 10 | Explainable coronary artery disease prediction model based on AutoGluon from AutoML framework (Wang et al. 2024a)                                                                        | five distinct data sets: Cleveland (303 observations), Hungary (294 observations), Switzerland (123 observations), VA Long Beach (200 observations), and Statlog (270 observations)             |
| 11 | Enhanced abnormal data detection hybrid strategy based on heuristic and stochastic approaches for efficient patients rehabilitation (Khan et al. 2024)                                   | A clinical dataset containing exercise data (including Borg RPE and TUG indicators) from real patient clinical data is acquired from JNU, Republic of Korea                                     |
| 12 | A User-friendly Approach for the Diagnosis of Diabetic Retinopathy Using ChatGPT and Automated Machine Learning (Mohammadi & Nguyen 2024)                                                | Methods to Evaluate Segmentation and Indexing Techniques in the field of Retinal Ophthalmology (Messidor-2), an open-source dataset                                                             |
| 13 | Machine learning model matters its accuracy: a comparative study of ensemble learning and AutoML using heart disease prediction (Rimal et al. 2024)                                      | UCI Heart Disease Dataset (303 samples, 14 features)                                                                                                                                            |
| 14 | AutoML-Driven Insights into Patient Outcomes and Emergency Care During Romania's First Wave of COVID-19 (Simon et al. 2024)                                                              | DRG database of COVID-19 patients in Romania (825,698 cases of disease)                                                                                                                         |

|    |                                                                                                                                                                                                    |                                                                                                                                                                                                                                                                                                                                                                                                                                                                                                      |
|----|----------------------------------------------------------------------------------------------------------------------------------------------------------------------------------------------------|------------------------------------------------------------------------------------------------------------------------------------------------------------------------------------------------------------------------------------------------------------------------------------------------------------------------------------------------------------------------------------------------------------------------------------------------------------------------------------------------------|
| 15 | Enhancing paranasal sinus disease detection with AutoML: efficient AI development and evaluation via magnetic resonance imaging (Cheong et al. 2024)                                               | 1313 unique non-TSE T2w MRI head sessions collected by Washington University in St Louis (WUSTL) Knight Alzheimer's Disease Research Center (ADRC) from the OASIS-3 repository                                                                                                                                                                                                                                                                                                                       |
| 16 | Cardiovascular health management in diabetic patients with machine-learning-driven predictions and interventions (Jose et al. 2024)                                                                | DSD, which is a clean and organized version of the 2015 BRFSS dataset and DRD, a UCI dataset encompassing a decade (1999–2008) of clinical care data from 130 hospitals across the United States.                                                                                                                                                                                                                                                                                                    |
| 17 | Few-shot learning to identify atypical endometrial hyperplasia and endometrial cancer based on transvaginal ultrasonic images (Wang et al. 2024b)                                                  | Dataset 1 TVU images representing NAEH, AEH, and EC, with 100 samples per class, acquired from the First Affiliated Hospital of Soochow University.<br>Dataset 2 consisted of TVU images of NAEH, AEH, and EC, each with 33 instances per category, obtained from the Suzhou Hospital of Traditional Chinese Medicine.<br>Dataset 3 included TVU images of normal uterine conditions and uterine myoma, with 300 images per class, sourced from the First Affiliated Hospital of Soochow University. |
| 18 | Predicting rapid progression in knee osteoarthritis: a novel and interpretable automated machine learning approach, with specific focus on young patients and early disease (Castagno et al. 2025) | Osteoarthritis Initiative (OAI)                                                                                                                                                                                                                                                                                                                                                                                                                                                                      |
| 19 | A predictive study on HCV using automated machine learning models (Değer & Can 2025)                                                                                                               | HCV dataset from UCI Machine Learning Repository                                                                                                                                                                                                                                                                                                                                                                                                                                                     |
| 20 | A recommender system with multi-objective hybrid Harris Hawk optimization for feature selection and disease diagnosis (Kuanr & Mohapatra 2025)                                                     | Diabetic, ILPD, Dermatology, Cervical Cancer, Risk Classification, Breast Cancer W, Cardiotocography, Hepatitis, Heart, Lymphography, COVID-19                                                                                                                                                                                                                                                                                                                                                       |
| 21 | The Prediction of Recombination Hotspot Based on Automated Machine Learning (Ye et al. 2025)                                                                                                       | The S1 dataset comprises 490 recombination hotspots and 591 recombination coldspots. The S2 dataset consists of 3,480 sequence samples representing recombination hotspots and 3,471 sequence samples corresponding to recombination coldspots. The S3 dataset, generated by Liu in 2021, closely resembles the S2 dataset and also originates from budding yeast.                                                                                                                                   |
| 22 | UK Biobank MRI data can power the development of generalizable brain clocks: A study of standard ML/DL methodologies and performance analysis on external databases (Capó et al. 2025)             | ADNI, and NACC from UK Biobank                                                                                                                                                                                                                                                                                                                                                                                                                                                                       |
| 23 | Decoding Benign Prostatic Hyperplasia: Insights from Multi-Fluid Metabolomic Analysis (Xu et al. 2025)                                                                                             | An experimental cohort dataset specifically created for the study, including samples from BPH, LUTS and healthy individuals.                                                                                                                                                                                                                                                                                                                                                                         |
| 24 | Sovereignty in Automated Stroke Prediction and Recommendation System with Explanations and Semantic Reasoning (Chatterjee 2025)                                                                    | Public stroke dataset: Sample Count 5,110 records (4,861: No stroke [Class 0], 249: Stroke [Class 1])                                                                                                                                                                                                                                                                                                                                                                                                |

**Table S7 Summaries of studies by research questions**

Table S7 provides detailed summaries of the studies based on the research questions, covering preprocessing steps, denoising and cleaning, feature extraction, prediction models, performance metrics, and hyperparameter optimization (HPO) methods.

| Studies                    | Feature selection                                                                     | Feature extraction                                                    | Remove noise or Denoising                             | Prediction Model                                                                 | Performance metrics                                      | Hyperparameter optimization                                                  |
|----------------------------|---------------------------------------------------------------------------------------|-----------------------------------------------------------------------|-------------------------------------------------------|----------------------------------------------------------------------------------|----------------------------------------------------------|------------------------------------------------------------------------------|
| (Yang & Zou 2020)          | distal_DBA, HFE, mRMR, UnivariateFS                                                   | ADASYN, SMOTE, RandomOverSampler                                      | Normalizer, Scaler, LogIp, Transformer                | mAML: tree based classifier, LinearSVC, GaussianNB, LogisticRegression, SGD, KNN | Accuracy, F1 score, precision, recall, roc-auc, log loss | Parallel grid search                                                         |
| (Sakagami et al. 2020)     | Google AutoML Cloud Vision                                                            | Google AutoML Cloud Vision                                            | Google AutoML Cloud Vision                            | Google AutoML Cloud Vision                                                       | Recall, precision, roc-auc, F1score                      | Google AutoML Cloud Vision (name is Vertex AI now)                           |
| (Olsavsky et al. 2020)     | Parallel Heuristic Search Process of AutoTS, NUTS 2 Hospital Regions                  | Derivation Window, Time Series Function, Automatic Feature Derivation | Stationarity, moving averages,                        | AutoTS                                                                           | Gamma Deviance,RMSE, R-Squared, MAE, MAPE                | -                                                                            |
| (Valarmathi & Sheela 2021) | Sequential Forward Selection with ten-fold cross validation                           | with AutoML                                                           | with AutoML                                           | Random Forest model optimized with TPOT                                          | F1-Score, Precision, Sensitivity, Specificity, ROC-AUC   | Grid Search, Random Search and Genetic Programming (TPOT Classifier)         |
| (A. Romero et al. 2022)    | with AutoML                                                                           | with AutoML                                                           | with AutoML                                           | Auto-Sklearn, TPOT, H2O.ai AutoML ve Google AutoML                               | Accuracy, F1 score, sensitivity, and precision           | with AutoML                                                                  |
| (Mallikarachi et al. 2023) | ANOVA, chi-squared test, and covariance analyses, Recursive Feature Elimination (RFE) | with AutoML                                                           | with AutoML                                           | Traditional ML model, TPOT, H2O (XGBoost)                                        | Accuracy, F1 score, precision, recall,                   | Grid search cross-validation, Gradient Boosting, Random Forest, and XGBoost. |
| (Bhowmik et al. 2023)      | Featuretools                                                                          | Featuretools                                                          | Exploratory data analysis (EDA) with Pandas Profiling | CloudAISim with Auto-Keras using Google Cloud Platform                           | Accuracy, F1 score, precision, recall,                   | AutoKeras hyperparameters optimization                                       |
| (Paladino et al. 2023)     | With AutoML                                                                           | With AutoML                                                           | removed to ensure data integrity                      | AutoKeras v1.1.0, PyCaret v3.0, and AutoGluon v0.7.0                             | Accuracy, F1 score,                                      | Random Forest, AdaBoost, Gradient Boosting, XGBoost with Grid Search         |



|                           |                                                               |                                                                                                                      |                                                                            |                                                                                                                   |                                                                                                    |                                                          |
|---------------------------|---------------------------------------------------------------|----------------------------------------------------------------------------------------------------------------------|----------------------------------------------------------------------------|-------------------------------------------------------------------------------------------------------------------|----------------------------------------------------------------------------------------------------|----------------------------------------------------------|
| (Dobrić et al. 2023)      | With AutoML                                                   | With AutoML                                                                                                          | With AutoML                                                                | SVM, RF, LR, kNN, ANN with Weka and AutoML                                                                        | Accuracy, Sensitivity Specificity                                                                  | With AutoML                                              |
| (Wang et al. 2024a).      | With AutoGluon and explainability is ensured with SHAP        | With AutoGluon                                                                                                       | With AutoGluon                                                             | AutoGluon, Amazon Web Services (AWS) with "4 bag-fold" to reduce overfitting and "1 stack-level" for meta-learner | Accuracy, F1 score, precision, recall, AUC                                                         | Automatically implemented within the AutoGluon framework |
| (Khan et al. 2024)        | With AutoML                                                   | With AutoML                                                                                                          | k-means clustering + IQR (interquartile range) based stochastic filtering. | Heuristic (k-means) + Stochastic (IQR) analysis + AutoML regression process                                       | R2 Score, MAE, MSE, RMSE and MAPE                                                                  | With AutoML                                              |
| (Mohammadi & Nguyen 2024) | R and Python scripts with ChatGPT                             | R and Python scripts with ChatGPT                                                                                    | CLAHE technique by Fiji software                                           | ChatGPT and Vertex AI is an AutoML                                                                                | Accuracy, Sensitivity, Specificity, Positive Predictive Value, Negative Predictive Value, F1 Score | Vertex AI                                                |
| (Rimal et al. 2024)       | Separation of Dependent and Independent Variables             | Normalization, Fit and Transform (StandardScaler)                                                                    | mean value imputation and one-hot encoding                                 | SVM, LR, ANN, KNN, RF, GaussianNB, DT, Perceptron, and H2O AutoML                                                 | Accuracy, Precision, Recall, F1-Score, AUC-ROC, LogLoss, Gini, MSE, RMSE                           | H2O package                                              |
| (Simon et al. 2024)       | Analysis of important variables                               | New boolean properties added                                                                                         | Removed unnecessary columns, translated from Romanian to English           | Light Gradient Boosted and Generalized Linear Model with AutoML                                                   | F1 Score, Accuracy, AUC, LogLoss, RMSE, FVE Binomial, Max MCC                                      | Early Stopping, ElasticNet, XGBoost,                     |
| (Cheong et al. 2024)      | Selected specific imaging modalities and slices with LabelBox | A single meaningful 2D slice was extracted from the 3D MRI; semantic labels were also extracted by experts (Yes/No). | Visually or radiologically inadequate images were omitted                  | Google Cloud AutoML Vertex AI                                                                                     | Sensitivity, specificity, accuracy                                                                 | Google Cloud AutoML Vertex AI                            |

|                          |                                                                                                            |                                                                                        |                                                                                                                                            |                                                                     |                                                                                        |                                                                                  |
|--------------------------|------------------------------------------------------------------------------------------------------------|----------------------------------------------------------------------------------------|--------------------------------------------------------------------------------------------------------------------------------------------|---------------------------------------------------------------------|----------------------------------------------------------------------------------------|----------------------------------------------------------------------------------|
| (Jose et al. 2024)       | Education with less but more meaningful data                                                               | Label encoding, One-hot encoding and Feature scaling                                   | Some features have been excluded due to their complexity or the absence of data.                                                           | PyCaret library                                                     | F1-Score, Accuracy, Precision, Recall, AUC-ROC, Kappa, MCC                             | Fine-tuning the max_depth hyperparameter to avoid overfitting                    |
| (Wang et al. 2024b)      | Grey level co-occurrence matrix, Gabor filter, Gauss Markov Random Field, Tamura features, grey histogram. | ResNet50 V2 and Xception 1*64 eigenvector                                              | Masked as the ROI with Matlab                                                                                                              | H2O AutoML, ResNet-50, Few-shot learning (FSL), sonographer model   | F1-score Accuracy, recall, precision                                                   | Automatic hyperparameter tuning and K-fold cross-validation                      |
| (Castagno et al. 2025)   | 7 feature selection algorithms with AutoPrognosis V.2.0                                                    | 7 feature scaling algorithms AutoPrognosis V.2.0                                       | 7 feature selection algorithms with AutoPrognosis V.2.0                                                                                    | 23 classification algorithms with AutoPrognosis V.2.0               | AUC-PRC, AUC-ROC, F1 score, Precision, Recall                                          | 100 iterations of Bayesian optimization, KernelSHAP                              |
| (Değer & Can 2025)       | Automatic feature selection with AutoML                                                                    | Average Derivative (AD) and Polynomial Features (PF)                                   | Random Over-Sampling (ROS)                                                                                                                 | PyCaret, H2OAutoML, TPOT, AutoGluon, FlaML, Mljar, PyTorch          | Accuracy, precision, recall, F1-score,                                                 | hyperparameters automatically tuned with AutoML                                  |
| (Kuanr & Mohapatra 2025) | MOGA, MOHHO, MOGAHHO                                                                                       | PCA, SVD, AE                                                                           | Top-3 features, best classifier, for the reduced dataset,                                                                                  | Tree-based Pipeline Optimization Tool (TPOT)                        | BA, MCC, BM, MK, Precision@Top-N                                                       | TOPSIS, HHO, GA                                                                  |
| (Ye et al. 2025)         | Automatic (built-in methods in AutoML)                                                                     | TF-IDF-Khmer, DNA composition components                                               | Intra-model importance assessments (SHAP)                                                                                                  | AutoGluon (ensemble-based models)                                   | Sensitivity, Specificity F1, MCC, Acc, auPRC, and auROC                                | AutoML (automatic optimization of AutoGluon)                                     |
| (Capó et al. 2025)       | No statistical or algorithmic method for feature selection is mentioned.                                   | All MRI volumes harmonized, Volumetric brain region features extracted with FastSurfer | FastSurfer compatible format and normalization, unsigned 8-bit UCHAR images, (256 <sup>3</sup> ) and 1mm <sup>3</sup> isotropic voxel used | Ridge, Elastic Nets, LASSO and OLS, TPOT, FLAML and XGBoost/LGBM    | MAE, R <sup>2</sup> , MSE, Mean PAD per bin, corr, AUROC                               | LASSO and Ridge, TPOT and FLAML, and Hyperopt (Bergstra et al. 2015)             |
| (Xu et al. 2025)         | PCA, t-SNE, UMAP, ElasticNet, Lasso and Ridge                                                              | Feature Detection with LDI-MS, Intensity and Range Filtering                           | Polynomial fitting, wavelet denoising, mean loading, ComBat, batch normalization, Gaussian filter.                                         | ElasticNet, Lasso and Ridge regression, and PyCaret AutoML platform | AUC, Accuracy, F1 Score, Kappa Score, MSE, Precision, Recall, Sensitivity, Specificity | Random search, grid search, and more advanced methods like Bayesian optimization |

|                   |                   |                    |                                                     |                                                                |                                            |                                                |
|-------------------|-------------------|--------------------|-----------------------------------------------------|----------------------------------------------------------------|--------------------------------------------|------------------------------------------------|
|                   |                   |                    |                                                     |                                                                |                                            |                                                |
| (Chatterjee 2025) | SelectKBest, LIME | Variance Threshold | Missing data analysis and filling, outlier control. | TPOT (AutoML) VarianceThreshold (0.1) + DecisionTreeClassifier | Accuracy, Precision, Recall, F1-Score, MCC | Genetic algorithm-based TPOT has automated HPO |

**Table S8 Dataset, disease, AutoML-ML method and performance**

The table summarizes key information from studies reviewed in the paper. "Dataset / Data Type" refers to the datasets and the type of data used in the study. "Disease / Task" indicates the specific disease targeted and the machine learning task performed, such as classification or prediction. "Author (Year)" shows the name of the study's author(s) and its publication year. "ML/AutoML Method" lists the machine learning or automated machine learning methods applied in the study. "Best Accuracy / Performance" presents the highest accuracy or performance metric reported, reflecting the effectiveness of the applied methods.

| <b>Dataset / Data Type</b>                  | <b>Disease / Task</b>                                           | <b>Author (Year)</b>         | <b>ML/AutoML Method</b>                   | <b>Best Accuracy / Performance</b>       |
|---------------------------------------------|-----------------------------------------------------------------|------------------------------|-------------------------------------------|------------------------------------------|
| 13 Benchmark Microbiome Datasets            | Multi-class disease classification                              | (Yang & Zou 2020)            | mAML                                      | High performance (exact value not given) |
| Chest CT Scans                              | COVID-19 pneumonia detection                                    | (Sakagianni et al. 2020)     | AutoML (unspecified)                      | Average precision 0.932                  |
| Romanian Hospitalization ICD-10 Time Series | Forecasting top 10 fatal diseases                               | (Olsavszky et al. 2020)      | AutoTS                                    | High accuracy (not specified)            |
| Cleveland Heart Disease (CHD) Dataset       | Coronary heart disease prediction                               | (Valarmathi & Sheela 2021)   | RF + TPOT (Hyperparameter Optimization)   | 97.52% accuracy                          |
| Z-Alizadeh Sani Dataset                     | Coronary artery stenosis prediction                             | (Valarmathi & Sheela 2021)   | RF + Random Search                        | 80.2% (LAD), 73.6% (LCX), 76.9% (RCA)    |
| Large-scale Insurance Claims Data           | General disease prediction                                      | (A. Romero et al. 2022)      | TPOT, Auto-Sklearn, H2O.ai, Google AutoML | TPOT highest accuracy (not specified)    |
| T2D, CKD, IHD Datasets                      | Type 2 Diabetes, Chronic Kidney Disease, Ischemic Heart Disease | (Mallikarachchi et al. 2023) | Auto-Sklearn, TPOT, H2O                   | T2D Auto-Sklearn: 86.8%, CKD TPOT:       |

|                                                           |                                                    |                              |                                                                                                    |                                                                    |
|-----------------------------------------------------------|----------------------------------------------------|------------------------------|----------------------------------------------------------------------------------------------------|--------------------------------------------------------------------|
|                                                           |                                                    |                              |                                                                                                    | 99.65%, IHD<br>TPOT: 74.56%                                        |
| Breast Cancer,<br>Heart Disease,<br>Diabetes,<br>COVID-19 | Multi-disease<br>classification                    | (Bhowmik et al.<br>2023)     | Auto-Keras                                                                                         | 96% - 98%<br>accuracy range                                        |
| Cleveland,<br>Hungarian,<br>Combined<br>(Heart)           | Heart Disease                                      | (Paladino et al.<br>2023)    | AutoGluon (78–<br>86%), PyCaret<br>(65–83%),<br>AutoKeras (54–<br>83%), Traditional<br>ML (55–60%) | 78–86%<br>(AutoGluon)                                              |
| Hematochemical<br>Parameters<br>(Pediatric<br>Patients)   | SARS-CoV-2 vs<br>Influenza infection               | (Dobrijević et al.<br>2023)  | AutoML<br>(unspecified)                                                                            | 98.4% accuracy                                                     |
| Combined Heart<br>Disease Datasets                        | Coronary artery<br>disease prediction              | (Wang et al.<br>2024a)       | AutoGluon<br>(ensemble +<br>HPO)                                                                   | 91.67% accuracy,<br>AUC 0.9562                                     |
| Patient<br>Rehabilitation<br>Data                         | Health indicators<br>prediction (Borg<br>RPE, TUG) | (Khan et al.<br>2024)        | AutoML +<br>Hybrid (k-means<br>+ regression)                                                       | R <sup>2</sup> : 98.55% and<br>98.50%                              |
| Diabetic<br>Retinopathy                                   | Image-based<br>diagnosis                           | (Mohammadi &<br>Nguyen 2024) | AutoML +<br>ChatGPT                                                                                | 92%–95%<br>accuracy                                                |
| Heart Disease<br>Dataset (303<br>samples)                 | Heart disease<br>prediction                        | (Rimal et al.<br>2024)       | AutoML (GLM<br>best), ANN deep<br>learning                                                         | 88% (GLM),<br>89.6% (ANN)                                          |
| Romania<br>COVID-19<br>Dataset                            | COVID-19<br>outcome<br>prediction                  | (Simon et al.<br>2024)       | AutoML<br>(unspecified)                                                                            | F1=96.44%,<br>Accuracy=98.84%                                      |
| Sinonasal<br>Disease MRI<br>Images                        | Sinonasal disease<br>detection                     | (Cheong et al.<br>2024)      | Vertex AI<br>(Google Cloud)                                                                        | 92% accuracy                                                       |
| Cardiovascular<br>Risk in Diabetic<br>Patients            | Cardiovascular<br>risk prediction                  | (Jose et al. 2024)           | PyCaret +<br>LightGBM,<br>XGBoost                                                                  | AUC 0.83<br>(LightGBM),<br>balanced<br>performance with<br>XGBoost |
| AEH, NAEH,<br>EC TVU Images                               | Endometrial<br>disease diagnosis                   | (Wang et al.<br>2024b)       | H2O AutoML,<br>FSL, ResNet50<br>V2 + KNN                                                           | 87.8% accuracy                                                     |
| Knee<br>Osteoarthritis<br>(OA)                            | OA progression<br>prediction                       | (Castagno et al.<br>2025)    | AutoML<br>(unspecified)                                                                            | AUC-PRC 0.727<br>(multi-class),<br>0.764 (binary)                  |
| Hepatitis C Virus<br>(UCI ML<br>Dataset)                  | HCV diagnosis                                      | (Değer & Can<br>2025)        | 7 different<br>AutoML tools                                                                        | 99.29% - 100%<br>accuracy range                                    |

|                                               |                                      |                          |                                           |                                       |
|-----------------------------------------------|--------------------------------------|--------------------------|-------------------------------------------|---------------------------------------|
| Multiple Disease Datasets (10 datasets)       | General disease prediction           | (Kuanr & Mohapatra 2025) | TPOT + GA + HHO (MOGAHHO)                 | Highest accuracy (not specified)      |
| DNA Sequences                                 | Bioinformatics classification        | (Ye et al. 2025)         | AutoGluon                                 | 97.14%, 79.71%, 98.73% accuracy rates |
| Brain Age Estimation (UK Biobank, ADNI, NACC) | Neurodegenerative disease biomarkers | (Capó et al. 2025)       | Penalized linear models                   | AUROC ~0.90                           |
| Benign Prostatic Hyperplasia (BPH)            | BPH diagnosis                        | (Xu et al. 2025)         | MALDI-MS + Metabolomics + AutoML          | AUC = 0.830                           |
| Stroke                                        | Stroke deterioration prediction      | (Chatterjee 2025)        | TPOT + Decision Tree + Variance Threshold | 95.2% accuracy                        |

**Table S9 Binary contributions of selected studies according to research questions**

| Study                        | RQ1<br>AutoML<br>Methods | RQ2<br>Input<br>Features | RQ3<br>Feature<br>Engineering | RQ4<br>Denoising<br>Methods | RQ5<br>Train-<br>Test<br>Split | RQ6<br>Performance<br>Metrics | RQ7<br>Hyperparameter<br>Tuning |
|------------------------------|--------------------------|--------------------------|-------------------------------|-----------------------------|--------------------------------|-------------------------------|---------------------------------|
| (Yang & Zou 2020)            | 1                        | 1                        | 1                             | 1                           | 1                              | 1                             | 1                               |
| (Sakagianni et al. 2020)     | 1                        | 0                        | 0                             | 0                           | 0                              | 1                             | 0                               |
| (Olsavszky et al. 2020)      | 1                        | 1                        | 1                             | 1                           | 1                              | 1                             | 0                               |
| (Valarmathi & Sheela 2021)   | 1                        | 0                        | 0                             | 0                           | 1                              | 1                             | 1                               |
| (A. Romero et al. 2022)      | 1                        | 0                        | 0                             | 0                           | 1                              | 1                             | 0                               |
| (Mallikarachchi et al. 2023) | 1                        | 0                        | 0                             | 0                           | 1                              | 1                             | 1                               |
| (Bhowmik et al. 2023)        | 1                        | 1                        | 1                             | 1                           | 1                              | 1                             | 1                               |
| (Paladino et al. 2023)       | 1                        | 0                        | 0                             | 1                           | 1                              | 1                             | 1                               |
| (Dobrijević et al. 2023)     | 1                        | 0                        | 0                             | 0                           | 1                              | 1                             | 0                               |
| (Wang et al. 2024a).         | 1                        | 0                        | 0                             | 0                           | 1                              | 1                             | 1                               |
| (Khan et al. 2024)           | 1                        | 1                        | 1                             | 1                           | 1                              | 1                             | 1                               |
| (Mohammadi & Nguyen 2024)    | 1                        | 1                        | 1                             | 1                           | 1                              | 1                             | 1                               |

|                          |   |   |   |   |   |   |   |
|--------------------------|---|---|---|---|---|---|---|
| (Rimal et al. 2024)      | 1 | 1 | 1 | 1 | 1 | 1 | 1 |
| (Simon et al. 2024)      | 1 | 1 | 1 | 1 | 1 | 1 | 1 |
| (Cheong et al. 2024)     | 1 | 1 | 1 | 1 | 1 | 1 | 1 |
| (Jose et al. 2024)       | 1 | 1 | 1 | 1 | 1 | 1 | 1 |
| (Wang et al. 2024b)      | 1 | 1 | 1 | 1 | 1 | 1 | 1 |
| (Castagno et al. 2025)   | 1 | 1 | 1 | 1 | 1 | 1 | 1 |
| (Değer & Can 2025)       | 1 | 1 | 1 | 1 | 1 | 1 | 1 |
| (Kuanr & Mohapatra 2025) | 1 | 1 | 1 | 1 | 1 | 1 | 1 |
| (Ye et al. 2025)         | 1 | 1 | 1 | 1 | 1 | 1 | 1 |
| (Capó et al. 2025)       | 1 | 1 | 1 | 1 | 1 | 1 | 1 |
| (Xu et al. 2025)         | 1 | 1 | 1 | 1 | 1 | 1 | 1 |
| (Chatterjee 2025)        | 1 | 1 | 1 | 1 | 1 | 1 | 1 |
